# Supplementary material for: Self-assembled sonogels formed from 1,4-naphthalenedicarbonyldinicotinic acid hydrazide
Source: Royal Society of Chemistry journal article supplement (doi:10.1039/d2ra01391f), 2022-01-01
Supplement: d2ra01391f1.pdf [file d2ra01391f1.pdf]

## Electronic Supplementary Information (ESI)

### Self-assembled sonogels formed from 1,4- naphthalenedicarbonyldinicotinic acid hydrazide

Lieqiang Liao,<sup>‡</sup> Ruidong Liu,<sup>‡</sup> Shuwen Hu, Wenting Jiang, Yali Chen, Jinlian Zhong,  
Xinjian Jia,<sup>\*</sup> Huijin Liu<sup>\*</sup> and Xuzhong Luo<sup>\*</sup>

<sup>a</sup> Key Laboratory of Organo-Pharmaceutical Chemistry of Jiangxi Province, College  
of Chemistry and Chemical Engineering, Gannan Normal University, Ganzhou  
341000, P. R. China.

E-mail: jiaxinjian.love@163.com; chemlhj@163.com; luoxuzhong@hotmail.com

<sup>‡</sup> These authors contributed equally to this work.

# Table of Contents

|                                                                                                                                                                          |    |
|--------------------------------------------------------------------------------------------------------------------------------------------------------------------------|----|
| Table of Contents.....                                                                                                                                                   | 1  |
| 1. Experimental Section.....                                                                                                                                             | 2  |
| 1.1 Synthesis.....                                                                                                                                                       | 2  |
| Scheme S1 Synthetic routes for compounds used in this work.....                                                                                                          | 3  |
| Fig. S1 <sup>1</sup> H NMR and <sup>13</sup> C NMR spectra of NDC-NN3 in DMSO- <i>d</i> <sub>6</sub> .....                                                               | 5  |
| Fig. S2 <sup>1</sup> H NMR and <sup>13</sup> C NMR spectra of NDC-NNpH in DMSO- <i>d</i> <sub>6</sub> .....                                                              | 6  |
| Fig. S3 <sup>1</sup> H NMR and <sup>13</sup> C NMR spectra of NDC-NN4/NDC-NN2 in DMSO- <i>d</i> <sub>6</sub> .....                                                       | 7  |
| Fig. S4 <sup>1</sup> H NMR and <sup>13</sup> C NMR spectra of NDC-N3/NDC-N4 in DMSO- <i>d</i> <sub>6</sub> .....                                                         | 7  |
| Table S1 Gelation behavior of NDC-NN3, NDC-NN4 and NDC-NN2 under sonication in various solvents.....                                                                     | 8  |
| Table S2 Gelation behavior of NDC-NNpH, NDC-N3 and NDC-N4 under sonication in various solvents.....                                                                      | 9  |
| Fig. S5 Photographs of NDC-NN3 gels formed under ultrasonic irradiation in various solvents at 10 mg·mL <sup>-1</sup> .....                                              | 10 |
| Table S3 Gelation behavior of NDC-NN3 upon different ultrasonic time in ethanol, THF and 1, 4-dioxane with various concentrations.....                                   | 11 |
| Fig. S6 Images of NDC-NN3 gels formed under ultrasonic irradiation in ethanol at different concentrations.....                                                           | 12 |
| Fig. S7 Schematic diagrams of the reversible sol-gel transition processes for NDC-NN3 in different solvents (10 mg·mL <sup>-1</sup> ) under stirring and sonication..... | 13 |
| Fig. S8 HPLC chromatogram of gelator NDC-NN3.....                                                                                                                        | 14 |
| Fig. S9 <sup>1</sup> H NMR spectra of NDC-NN3 before and after sonication.....                                                                                           | 15 |
| Fig. S10 <sup>13</sup> C NMR spectra of NDC-NN3 before and after sonication.....                                                                                         | 15 |
| Fig. S11 Moduli variations of NDC-NN3 sonogels with increasing temperature.....                                                                                          | 16 |
| Fig. S12 SEM images of NDC-NN3 aggregates in dried sonogels formed in different solvents.....                                                                            | 17 |
| Table S4 Transformation of gel-crystal for NDC-NN3 in various solvents.....                                                                                              | 18 |
| Fig. S13 Images of NDC-NN3 aggregates in sonogel (ethanol, 20 mg·mL <sup>-1</sup> ) aged at room temperature.....                                                        | 19 |
| Fig. S14 SA-XRD patterns of NDC-NN3 sonogel.....                                                                                                                         | 20 |
| Table S5 Crystal data and structure refinement for NDC-NN3.....                                                                                                          | 21 |
| Table S6 Selected bond lengths (Å) and angles (°) for NDC-NN3 crystal.....                                                                                               | 22 |
| Fig. S15 CPK space-filling model of NDC-NN3.....                                                                                                                         | 25 |
| Fig. S16 FT-IR spectra of NDC-NN3 crystal and xerogels.....                                                                                                              | 26 |
| Fig. S17 Variable-time <sup>1</sup> H NMR spectra of NDC-NN3 sonogel (ethanol- <i>d</i> <sub>6</sub> , 20 mg·mL <sup>-1</sup> ).....                                     | 27 |

Fig. S18 Schematic representation of the possible local aggregation for NDC-NN3 in sonogels.....28  
2. References.....29

## 1. Experimental Section

### 1.1 Synthesis

The compound 1,4-naphthalenedicarbonyldinicotinic acid hydrazide (NDC-NN3) was prepared according to the literature method.<sup>1</sup> The compounds of 1,4-naphthalenedicarbonyldiisonicotinic acid hydrazide (NDC-NN4), 1,4-naphthalenedicarbonyldipyridine-2-carboxylic acid hydrazide (NDC-NN2), 1,4-naphthalenedicarbonyldibenzoic acid hydrazide (NDC-NNpH), N<sup>1</sup>,N<sup>4</sup>-di(pyridin-3-yl)-naphthalene-1,4-dicarboxamide (NDC-N3) and N<sup>1</sup>,N<sup>4</sup>-di(pyridin-4-yl)-naphthalene-1,4-dicarboxamide (NDC-N4) were prepared similar to NDC-NN3. In a typical experiment, 1,4-Naphthalenedicarbonyl dichloride was prepared from 1,4-Naphthalenedicarboxylic acid by treatment with SOCl<sub>2</sub> using a catalytic amount of DMF. Subsequently, a DCM (100mL) solution of naphthalene-1,4-dicarbonyl dichloride (2.53 g, 10.0 mmol) was then added dropwise to a DCM (100mL) solution of nicotinic acid hydrazide (2.88 g, 21.0 mmol) and triethylamine (3.0 mL, 29.6 mmol) with continuous stirring in an ice bath. After stirring for 24h, the pale yellow precipitate was filtered and washed with DCM for four times. The product was recrystallized from a mixed solvent of H<sub>2</sub>O (300 mL) and ethanol (100 mL), and then dried under vacuum to afford 3.7 g of NDC-NN3 (yield 70%). The compounds prepared in this work were characterized by FT-IR, <sup>1</sup>H NMR, <sup>13</sup>C NMR and LC-MS.

#### 1,4-naphthalenedicarbonyldinicotinic acid hydrazide (NDC-NN3)

<sup>1</sup>H NMR (400MHz, DMSO-*d*<sub>6</sub>, δ<sub>H</sub>): 10.92 (2H, s), 10.71 (2H, s), 9.14 (2H, *J* = 1.6 Hz, d), 8.81 (1 H, *J* = 4.8, 1.7 Hz, dd), 8.48 (2H, *J* = 6.5, 3.3 Hz, dd), 8.39 – 8.31 (2H, m), 7.78 (2H, s), 7.72 (2H, *J* = 6.5, 3.3 Hz, dd), 7.62 (2H, *J* = 7.9, 4.8 Hz, dd). <sup>13</sup>C NMR (100MHz, DMSO-*d*<sub>6</sub>, δ<sub>C</sub>): 168.15, 165.04, 153.15, 148.97, 135.83, 135.34, 130.49, 128.53, 127.89, 126.20, 125.04, 124.30. IR (KBr): 3234, 1658, 1594, 1515, 1474, 1421, 1293, 1261, 1172, 1140, 1028, 907, 825, 772, 705, 485 cm<sup>-1</sup>. LC-MS [M+H]<sup>+</sup> calculated for C<sub>17</sub>H<sub>13</sub>N<sub>5</sub>O<sub>2</sub> : *m/z* 454.1389; found: 455.1476.

### 1,4-naphthalenedicarbonyldiisonicotinic acid hydrazide (NDC-NN4)

$^1\text{H}$  NMR (400MHz, DMSO-*d*<sub>6</sub>,  $\delta_{\text{H}}$ ): 11.02 (2H, s), 10.74 (2H, s), 8.88 – 8.81 (4H, m), 8.47 (2H,  $J = 6.5, 3.3$  Hz, dd), 7.90 (4H,  $J = 4.4, 1.6$  Hz, dd), 7.78 (2H, s), 7.73 (2H,  $J = 6.5, 3.3$  Hz, dd).  $^{13}\text{C}$  NMR (100MHz, DMSO-*d*<sub>6</sub>,  $\delta_{\text{C}}$ ): 168.07, 164.91, 151.04, 139.84, 135.30, 130.49, 127.93, 126.19, 125.07, 121.89. IR (KBr): 3425, 3177, 1661, 1603, 1553, 1515, 1410, 1293, 1259, 1141, 1064, 846, 778, 675, 469  $\text{cm}^{-1}$ . LC-MS  $[\text{M}+\text{H}]^+$  calculated for  $\text{C}_{17}\text{H}_{13}\text{N}_5\text{O}_2$  :  $m/z$  454.1389; found: 455.1475.

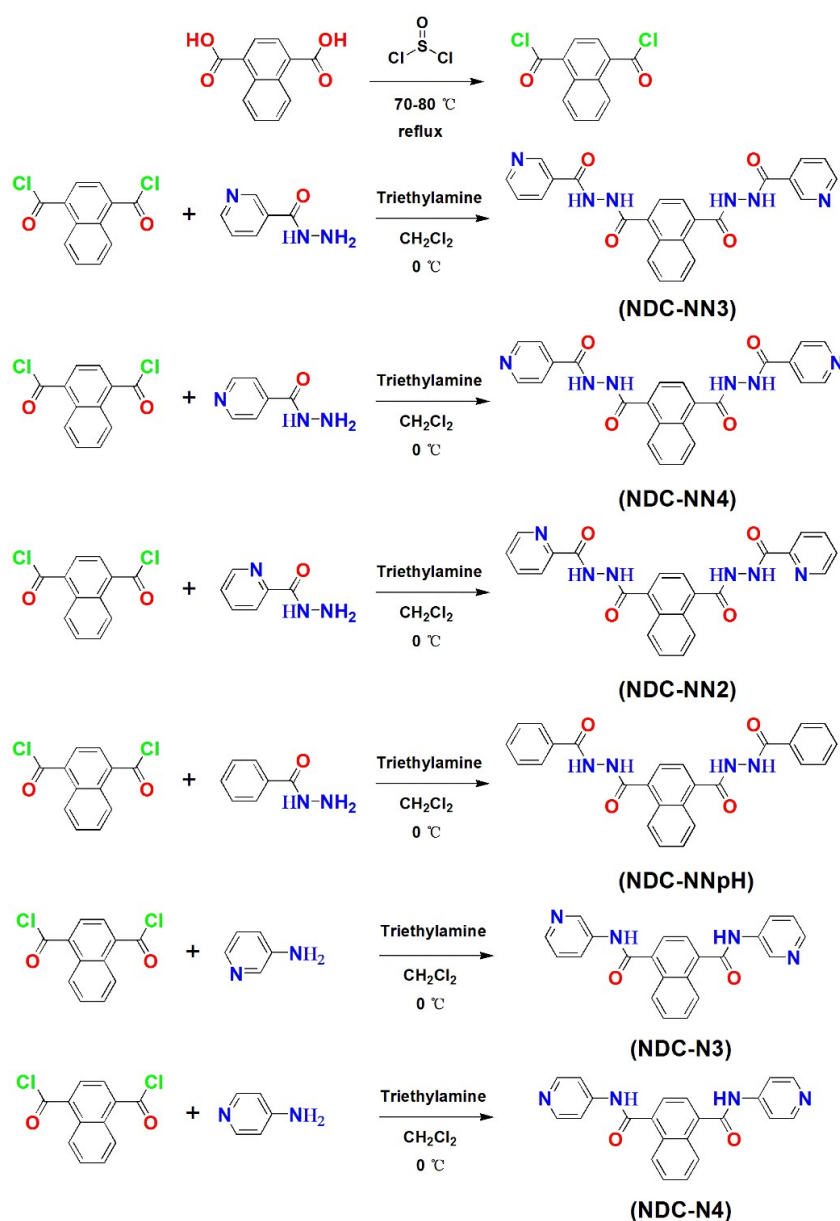

**Scheme S1.** Synthetic routes for gelators (NDC-NN3, NDC-NN4, NDC-NN2, NDC-NNpH, NDC-N3 and NDC-N4) in this work

### 1,4-naphthalenedicarbonyldipyridine-2-carboxylic acid hydrazide (NDC-NN2)

$^1\text{H}$  NMR (400MHz, DMSO-*d*<sub>6</sub>,  $\delta_{\text{H}}$ ): 10.85 (2H, s), 10.66 (2H, s), 8.75 (2H,  $J = 4.6$  Hz, d), 8.49 (2H,  $J = 6.5, 3.3$  Hz, dd), 8.15 (2H,  $J = 7.7$  Hz, d), 8.09 (1 H,  $J = 7.6, 1.7$  Hz, td), 7.75 (2H, s), 7.73 – 7.65 (4H, m).  $^{13}\text{C}$  NMR (100MHz, DMSO-*d*<sub>6</sub>,  $\delta_{\text{C}}$ ): 167.79, 163.85, 149.67, 149.23, 138.41, 135.46, 130.53, 127.66, 127.60, 126.34, 124.93, 123.98. IR (KBr): 3381, 3260, 1677, 1651, 1590, 1571, 1490, 1431, 1283, 1242, 1140, 1040, 858, 816, 747, 620  $\text{cm}^{-1}$ .  $[\text{M}+\text{H}]^+$  calculated for  $\text{C}_{17}\text{H}_{13}\text{N}_5\text{O}_2$  :  $m/z$  454.1389; found: 455.1464.

**1,4-naphthalenedicarbonyldibenzoic acid hydrazide (NDC-NNpH)**

$^1\text{H}$  NMR (400MHz, DMSO-*d*<sub>6</sub>,  $\delta_{\text{H}}$ ): 10.73 (2H, s), 10.64 (2H, s), 8.51 (2H,  $J = 6.5, 3.3$  Hz, dd), 8.07 – 7.95 (4H, m), 7.78 (2H, s), 7.73 (2H,  $J = 6.5, 3.3$  Hz, dd), 7.68 – 7.61 (2H, m), 7.57 (4H,  $J = 11.4, 4.4$  Hz, dd).  $^{13}\text{C}$  NMR (100MHz, DMSO-*d*<sub>6</sub>,  $\delta_{\text{C}}$ ): 168.20, 166.33, 135.50, 132.86, 132.49, 130.53, 129.07, 128.01, 127.77, 126.28, 124.98. IR (KBr): 3424, 3179, 1655, 1601, 1575, 1545, 1473, 1287, 1258, 1076, 710, 477  $\text{cm}^{-1}$ .  $[\text{M}+\text{Na}]^+$  calculated for  $\text{C}_{26}\text{H}_{20}\text{N}_4\text{O}_4$  :  $m/z$  452.1485; found: 475.1378.

**N<sup>1</sup>,N<sup>4</sup>-di(pyridin-3-yl)-naphthalene-1,4-dicarboxamide (NDC-N3)**

$^1\text{H}$  NMR (400MHz, DMSO-*d*<sub>6</sub>,  $\delta_{\text{H}}$ ): 10.88 (2H, s), 8.97 (2H,  $J = 2.1$  Hz, d), 8.37 (2H,  $J = 4.7, 1.2$  Hz, dd), 8.32 – 8.21 (4H, m), 7.90 (2H, s), 7.70 (2H,  $J = 6.5, 3.3$  Hz, dd), 7.46 (2H,  $J = 8.3, 4.7$  Hz, dd).  $^{13}\text{C}$  NMR (100MHz, DMSO-*d*<sub>6</sub>,  $\delta_{\text{C}}$ ): 167.72, 145.31, 142.03, 136.74, 136.27, 130.22, 127.45, 126.05, 125.09, 124.22. IR (KBr): 3424, 3238, 1674, 1652, 1600, 1546, 1479, 1426, 1331, 1310, 1271, 880, 836, 793, 770, 705, 627, 473  $\text{cm}^{-1}$ . LC-MS  $[\text{M}+\text{H}]^+$  calculated for  $\text{C}_{17}\text{H}_{13}\text{N}_5\text{O}_2$  :  $m/z$  368.1273; found: 369.1357.

**N<sup>1</sup>,N<sup>4</sup>-di(pyridin-4-yl)-naphthalene-1,4-dicarboxamide (NDC-N4)**

$^1\text{H}$  NMR (400MHz, DMSO-*d*<sub>6</sub>,  $\delta_{\text{H}}$ ): 11.08 (2H, s), 8.54 (4H,  $J = 4.8, 1.5$  Hz, dd), 8.23 (1H,  $J = 6.5, 3.3$  Hz, dd), 7.90 (1H, s), 7.80 (2H, dd,  $J = 4.9, 1.4$  Hz, dd), 7.71 (1H,  $J = 6.5, 3.3$  Hz, dd).  $^{13}\text{C}$  NMR (100MHz, DMSO-*d*<sub>6</sub>,  $\delta_{\text{C}}$ ): 168.17, 150.95, 146.17, 136.64, 130.08, 128.17, 125.92, 125.14, 114.28. IR (KBr): 3291, 3225, 3153, 3062, 2967, 2926, 1685, 1594, 1514, 1418, 1331, 1301, 1252, 1208, 1181, 1146, 1029, 996, 886, 829, 768  $\text{cm}^{-1}$ . LC-MS  $[\text{M}+\text{H}]^+$  calculated for  $\text{C}_{22}\text{H}_{16}\text{N}_4\text{O}_2$  :  $m/z$  368.1273; found: 369.1346.

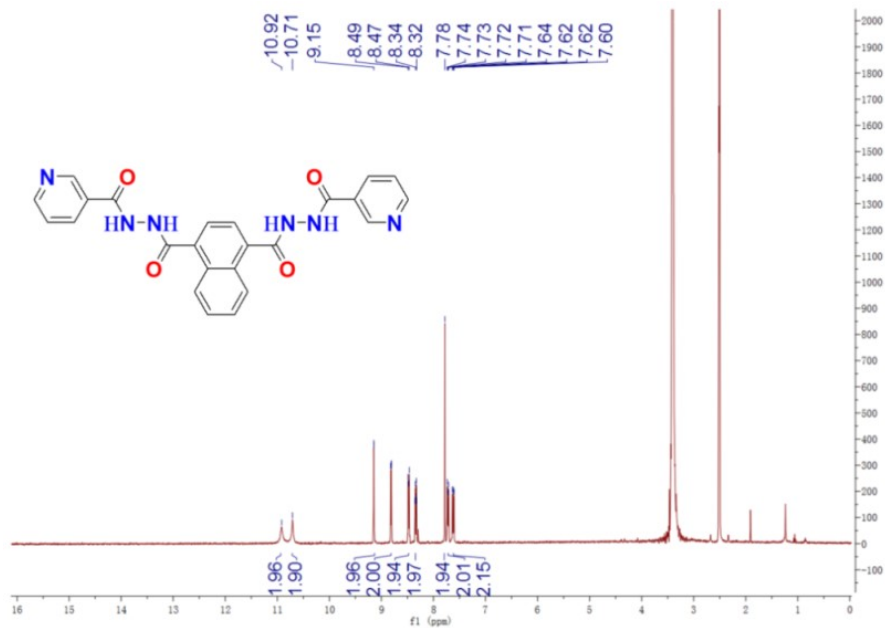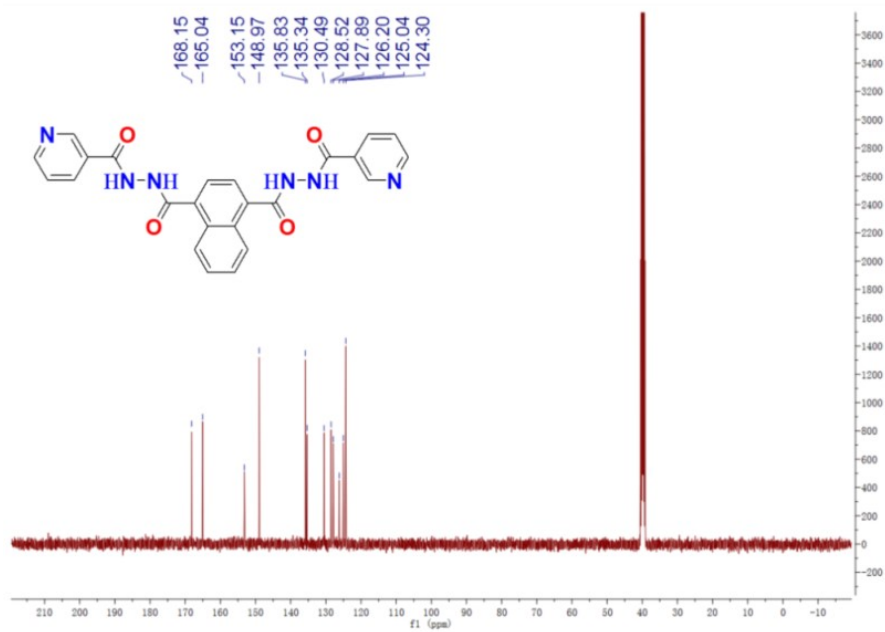

**Fig. S1.** <sup>1</sup>H NMR and <sup>13</sup>C NMR spectra of NDC-NN3 in DMSO-*d*<sub>6</sub>

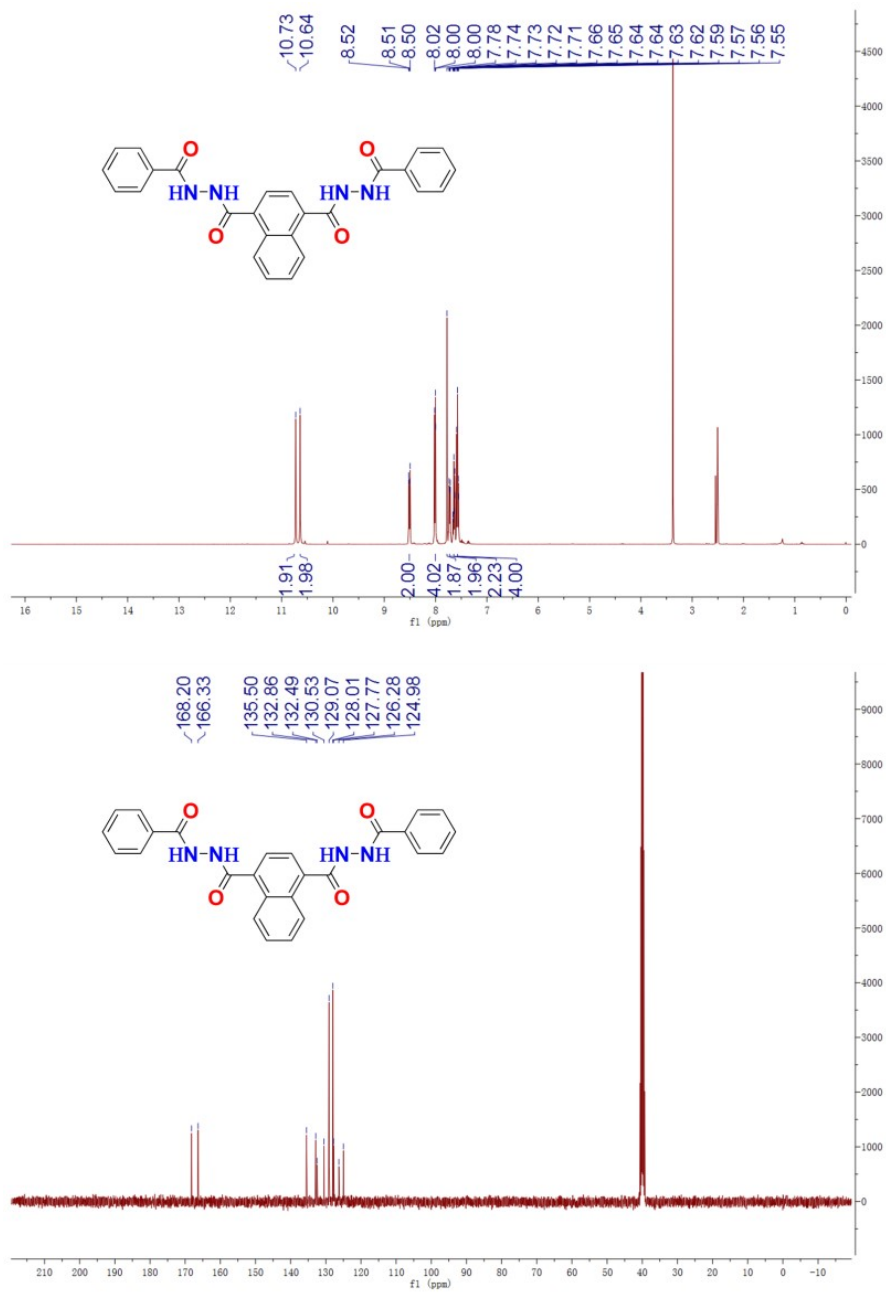

**Fig. S2.** <sup>1</sup>H NMR and <sup>13</sup>C NMR spectra of NDC-NNpH in DMSO-d<sub>6</sub>

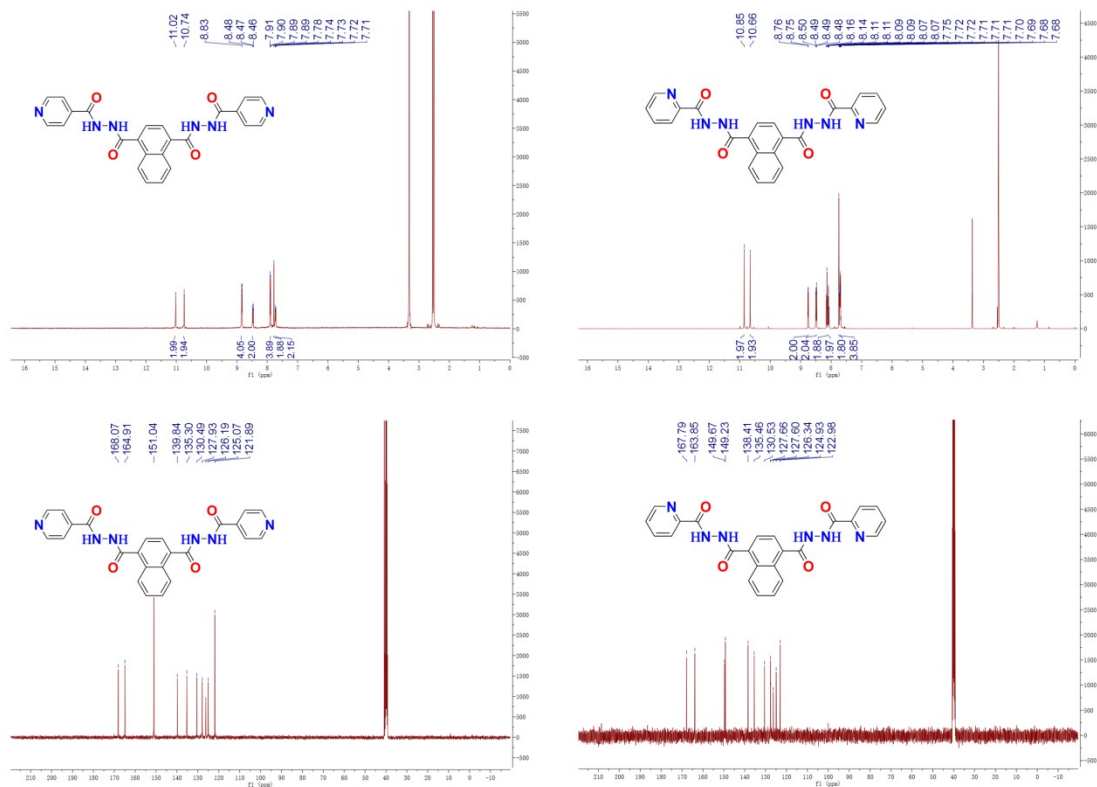

**Fig. S3.**  $^1\text{H}$  NMR and  $^{13}\text{C}$  NMR spectra of NDC-NN4/NDC-NN2 in  $\text{DMSO-}d_6$

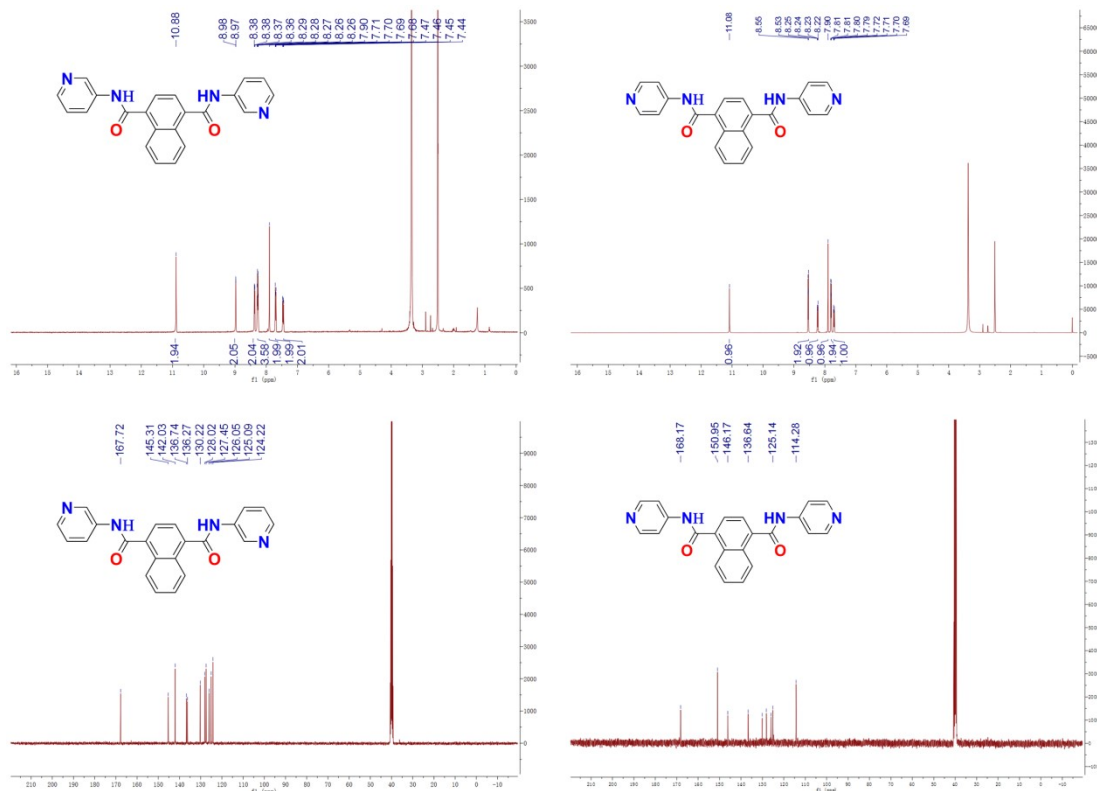

**Fig. S4**  $^1\text{H}$  NMR and  $^{13}\text{C}$  NMR spectra of NDC-N3/NDC-N4 in  $\text{DMSO-}d_6$



**Table S1.** Gelation behavior of NDC-NN3, NDC-NN4 and NDC-NN2 under sonication in various solvents

|    | Solvents                        | Compounds |         |         |
|----|---------------------------------|-----------|---------|---------|
|    |                                 | NDC-NN3   | NDC-NN4 | NDC-NN2 |
| 1  | Methanol                        | S (S)     | S (S)   | P (P)   |
| 2  | Ethanol                         | G (S)     | S (S)   | P (P)   |
| 3  | <i>n</i> -Propanol              | G (S)     | S (S)   | I (I)   |
| 4  | <i>n</i> -Butanol               | G (S)     | S (S)   | I (I)   |
| 5  | <i>n</i> -Pentanol              | G (S)     | S (S)   | P (P)   |
| 6  | THF                             | G (S)     | S (S)   | S (S)   |
| 7  | 1,4-Dioxane                     | G (S)     | S (S)   | P (P)   |
| 8  | Ethylene glycol                 | S (S)     | S (S)   | P (S)   |
| 9  | H <sub>2</sub> O                | I (I)     | I (I)   | I (I)   |
| 10 | DMSO                            | S (S)     | S (S)   | S (S)   |
| 11 | DMF                             | S (S)     | S (S)   | S (S)   |
| 12 | Aminobenzene                    | S (S)     | S (S)   | S (S)   |
| 13 | Acetonitrile                    | I (I)     | S (S)   | I (I)   |
| 14 | Pyridine                        | S (S)     | S (S)   | S (S)   |
| 15 | Acetone                         | I (I)     | S (S)   | P (P)   |
| 16 | CHCl <sub>3</sub>               | I (I)     | I (I)   | P (P)   |
| 17 | Ethyl acetate                   | I (I)     | I (I)   | I (I)   |
| 18 | Tetralin                        | P (P)     | I (I)   | I (I)   |
| 19 | <i>n</i> -Butyl acetate         | I (I)     | I (I)   | I (I)   |
| 20 | CH <sub>2</sub> Cl <sub>2</sub> | P (P)     | I (I)   | I (I)   |
| 21 | Benzene                         | P (P)     | I (I)   | I (I)   |
| 22 | Ethyl ether                     | I (I)     | I (I)   | I (I)   |
| 23 | <i>o</i> -Dichlorobenzene       | I (I)     | I (I)   | I (I)   |
| 24 | Chlorobenzene                   | I (I)     | I (I)   | I (I)   |
| 25 | Mesitylene                      | I (I)     | I (I)   | I (I)   |
| 26 | <i>p</i> -Xylene                | I (I)     | I (I)   | I (I)   |
| 27 | Toluene                         | I (I)     | I (I)   | I (I)   |
| 28 | Isopropyl ether                 | I (I)     | I (I)   | I (I)   |
| 29 | CCl <sub>4</sub>                | I (I)     | I (I)   | I (I)   |
| 30 | Cyclohexane                     | I (I)     | I (I)   | I (I)   |
| 31 | Hexane                          | I (I)     | I (I)   | I (I)   |
| 32 | Petroleum ether                 | I (I)     | I (I)   | I (I)   |

\* G = gel; S = solution; P = precipitate; I = insoluble. Glass vials containing compounds and solvents were heated and then cooled to room temperature. Subsequently, the mixed solutions were sonicated (40 KHz, 0.40 W·cm<sup>-2</sup>) in deionized water for a certain time. After standing at room temperature for 24 h without sonication, the values in parentheses were recorded.

**Table S2.** Gelation behavior of NDC-NNpH, NDC-N3 and NDC-N4 under sonication in various solvents

|    | Solvents                        | Compounds |        |        |
|----|---------------------------------|-----------|--------|--------|
|    |                                 | NDC-NNpH  | NDC-N3 | NDC-N4 |
| 1  | Methanol                        | P (S)     | P (P)  | P (S)  |
| 2  | Ethanol                         | I (I)     | P (P)  | P (S)  |
| 3  | <i>n</i> -Propanol              | I (I)     | I (I)  | P (S)  |
| 4  | <i>n</i> -Butanol               | I (I)     | I (I)  | I (I)  |
| 5  | <i>n</i> -Pentanol              | I (I)     | I (I)  | I (I)  |
| 6  | THF                             | I (I)     | I (I)  | I (I)  |
| 7  | 1,4-Dioxane                     | I (I)     | I (I)  | I (I)  |
| 8  | Ethylene glycol                 | P (S)     | P (P)  | I (S)  |
| 9  | H <sub>2</sub> O                | I (I)     | I (I)  | I (I)  |
| 10 | DMSO                            | S (S)     | S (S)  | P (S)  |
| 11 | DMF                             | S (S)     | S (S)  | P (S)  |
| 12 | Aminobenzene                    | S (S)     | S (S)  | P (S)  |
| 13 | Acetonitrile                    | I (I)     | I (I)  | I (I)  |
| 14 | Pyridine                        | I (I)     | I (I)  | I (I)  |
| 15 | Acetone                         | I (I)     | I (I)  | I (I)  |
| 16 | CHCl <sub>3</sub>               | I (I)     | I (I)  | I (I)  |
| 17 | Ethyl acetate                   | I (I)     | I (I)  | I (I)  |
| 18 | Tetralin                        | I (I)     | I (I)  | I (I)  |
| 19 | <i>n</i> -Butyl acetate         | I (I)     | I (I)  | I (I)  |
| 20 | CH <sub>2</sub> Cl <sub>2</sub> | I (I)     | I (I)  | I (I)  |
| 21 | Benzene                         | I (I)     | I (I)  | I (I)  |
| 22 | Ethyl ether                     | I (I)     | I (I)  | I (I)  |
| 23 | <i>o</i> -Dichlorobenzene       | I (I)     | I (I)  | I (I)  |
| 24 | Chlorobenzene                   | I (I)     | I (I)  | I (I)  |
| 25 | Mesitylene                      | I (I)     | I (I)  | I (I)  |
| 26 | <i>p</i> -Xylene                | I (I)     | I (I)  | I (I)  |
| 27 | Toluene                         | I (I)     | I (I)  | I (I)  |
| 28 | Isopropyl ether                 | I (I)     | I (I)  | I (I)  |
| 29 | CCl <sub>4</sub>                | I (I)     | I (I)  | I (I)  |
| 30 | Cyclohexane                     | I (I)     | I (I)  | I (I)  |
| 31 | Hexane                          | I (I)     | I (I)  | I (I)  |
| 32 | Petroleum ether                 | I (I)     | I (I)  | I (I)  |

\* G = gel; S = solution; P = precipitate; I = insoluble. Glass vials containing compounds and solvents were heated and then cooled to room temperature. Subsequently, the mixed solutions were sonicated (40 KHz, 0.40 W·cm<sup>-2</sup>) in deionized water for a certain time. After standing at room temperature for 24 h without sonication, the values in parentheses were recorded.

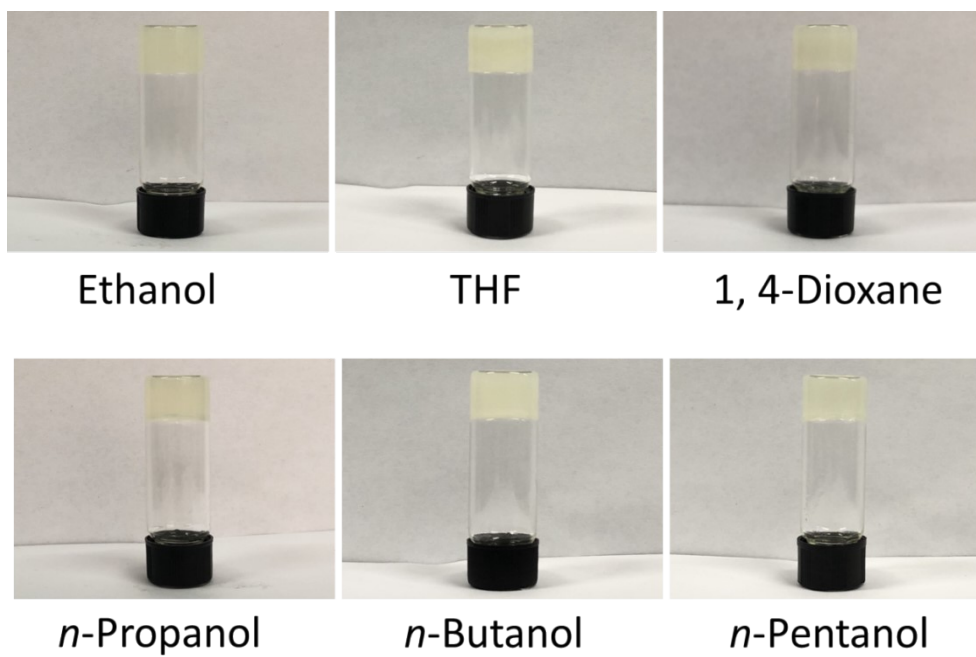

**Fig. S5.** Photographs of NDC-NN3 gels formed under ultrasonic irradiation in various solvents at  $10 \text{ mg}\cdot\text{mL}^{-1}$

**Table S3.** Gelation behavior of NDC-NN3 upon different ultrasonic time in ethanol, THF and 1, 4-dioxane with various concentrations

| Solvents                 | $C_{\text{NDC-NN3}}$<br>$\text{mg}\cdot\text{mL}^{-1}$ | Ultrasonic times / min |    |    |    |    |    |    |    |    |    |     |
|--------------------------|--------------------------------------------------------|------------------------|----|----|----|----|----|----|----|----|----|-----|
|                          |                                                        | 1                      | 2  | 5  | 10 | 15 | 20 | 25 | 30 | 40 | 60 | 120 |
| <b>Ethanol</b>           | 6                                                      | S                      | S  | S  | S  | S  | S  | S  | S  | S  | S  | S   |
|                          | 8                                                      | S                      | S  | S  | S  | S  | S  | S  | S  | S  | S  | TS  |
|                          | 10                                                     | S                      | S  | S  | S  | S  | S  | S  | S  | TS | G  | G   |
|                          | 20                                                     | S                      | S  | S  | TS | TS | G  | G  | G  | G  | G  | G   |
|                          | 30                                                     | S                      | TS | TS | G  | G  | G  | G  | G  | G  | G  | G   |
|                          | 40                                                     | TS                     | TS | G  | G  | G  | G  | G  | G  | G  | G  | G   |
|                          | 45                                                     | I                      | /  | /  | /  | /  | /  | /  | /  | /  | /  | /   |
| <b>THF</b>               | 2                                                      | S                      | S  | S  | S  | S  | S  | S  | S  | S  | S  | S   |
|                          | 4                                                      | S                      | S  | S  | S  | S  | S  | S  | S  | S  | S  | S   |
|                          | 6                                                      | S                      | S  | S  | S  | S  | S  | S  | S  | S  | S  | TS  |
|                          | 8                                                      | S                      | S  | S  | S  | S  | S  | S  | TS | TS | G  | G   |
|                          | 10                                                     | S                      | S  | S  | TS | TS | TS | TS | G  | G  | G  | G   |
|                          | 15                                                     | I                      | /  | /  | /  | /  | /  | /  | /  | /  | /  | /   |
| <b>1,4-Dioxane</b>       | 2                                                      | S                      | S  | S  | S  | S  | S  | S  | S  | S  | S  | S   |
|                          | 4                                                      | S                      | S  | S  | S  | S  | P  | TS | TS | TS | TS | TS  |
|                          | 6                                                      | S                      | S  | S  | TS | TS | G  | G  | G  | G  | G  | G   |
|                          | 8                                                      | S                      | S  | TS | G  | G  | G  | G  | G  | G  | G  | G   |
|                          | 10                                                     | S                      | TS | G  | G  | G  | G  | G  | G  | G  | G  | G   |
|                          | 15                                                     | I                      | /  | /  | /  | /  | /  | /  | /  | /  | /  | /   |
| <b><i>n</i>-Propanol</b> | 4                                                      | S                      | S  | S  | S  | S  | S  | S  | S  | S  | S  | S   |
|                          | 6                                                      | S                      | S  | S  | S  | S  | S  | S  | S  | S  | S  | TS  |
|                          | 8                                                      | S                      | S  | S  | S  | S  | S  | S  | S  | TS | TS | G   |
|                          | 10                                                     | S                      | S  | S  | S  | S  | S  | S  | S  | TS | G  | G   |
|                          | 15                                                     | S                      | S  | S  | TS | TS | TS | TS | G  | G  | G  | G   |
|                          | 20                                                     | I                      | /  | /  | /  | /  | /  | /  | /  | /  | /  | /   |

|                          |    |   |   |    |    |    |    |    |    |    |    |    |
|--------------------------|----|---|---|----|----|----|----|----|----|----|----|----|
| <b><i>n</i>-Butanol</b>  | 2  | S | S | S  | S  | S  | S  | S  | S  | S  | S  | S  |
|                          | 4  | S | S | S  | S  | S  | S  | S  | S  | S  | TS | TS |
|                          | 6  | S | S | S  | S  | S  | TS | TS | G  | G  | G  | G  |
|                          | 8  | S | S | S  | S  | TS | TS | G  | G  | G  | G  | G  |
|                          | 10 | S | S | TS | TS | TS | G  | G  | G  | G  | G  | G  |
|                          | 15 | I | / | /  | /  | /  | /  | /  | /  | /  | /  | /  |
| <b><i>n</i>-Pentanol</b> | 2  | S | S | S  | S  | S  | S  | S  | S  | S  | S  | S  |
|                          | 4  | S | S | S  | S  | S  | S  | S  | S  | S  | S  | S  |
|                          | 6  | S | S | S  | S  | S  | S  | S  | S  | S  | S  | TS |
|                          | 8  | S | S | S  | S  | S  | S  | S  | S  | TS | TS | G  |
|                          | 10 | S | S | S  | S  | S  | TS | TS | TS | TS | G  | G  |
|                          | 15 | I | / | /  | /  | /  | /  | /  | /  | /  | /  | /  |

\* G = gel; I = insoluble partially; S = solution; TS = turbid solution.

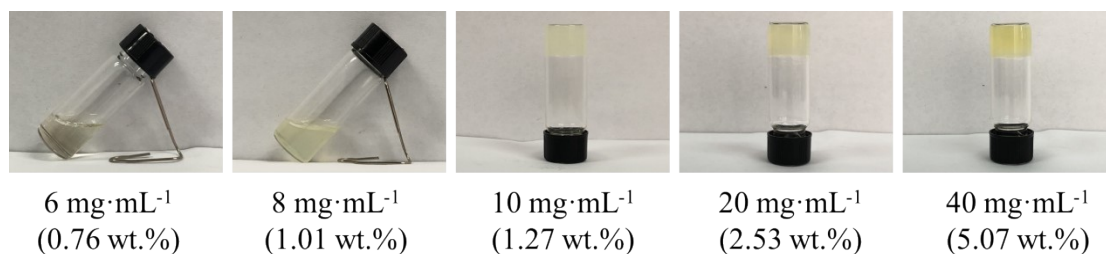

**Fig. S6.** Images of NDC-NN3 sonogels formed under ultrasonic irradiation in ethanol at different concentrations

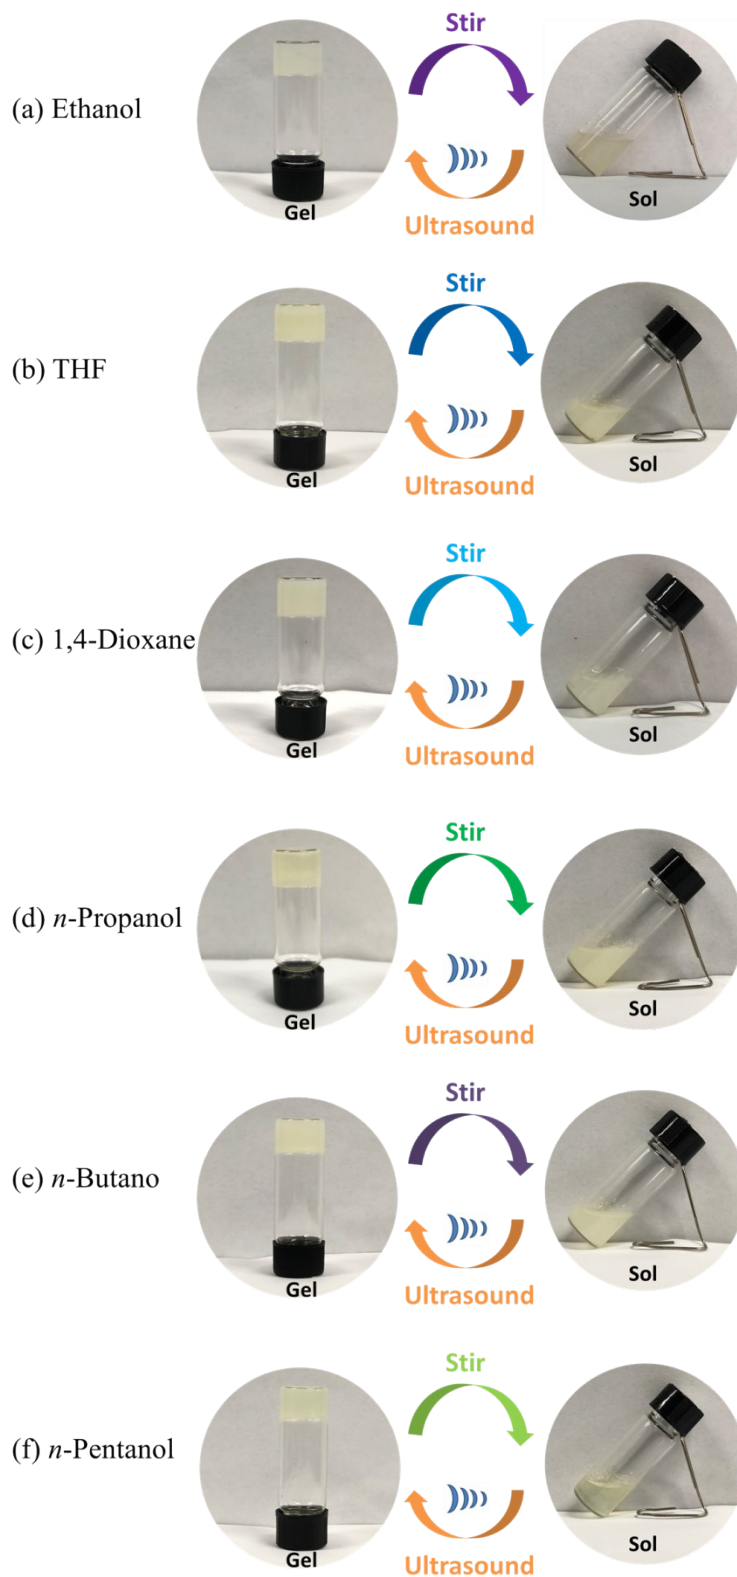

**Fig. S7.** Schematic diagrams of the reversible sol-gel transition processes for NDC-NN3 in different solvents ( $10 \text{ mg}\cdot\text{mL}^{-1}$ ) under stirring and sonication: (a) ethanol; (b) THF; (c) 1,4-dioxane; (d) *n*-propanol; (e) *n*-butanol; (f) *n*-pentanol

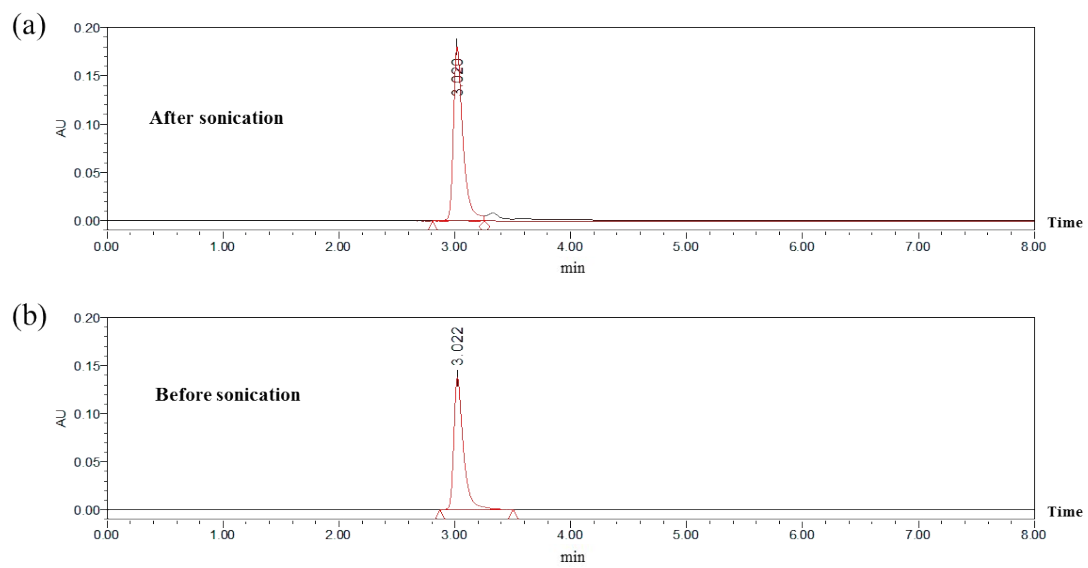

**Fig. S8.** HPLC chromatogram of gelator NDC-NN3: (a) after and (b) before formation of sonogel with  $\text{CH}_3\text{OH}$  as solution

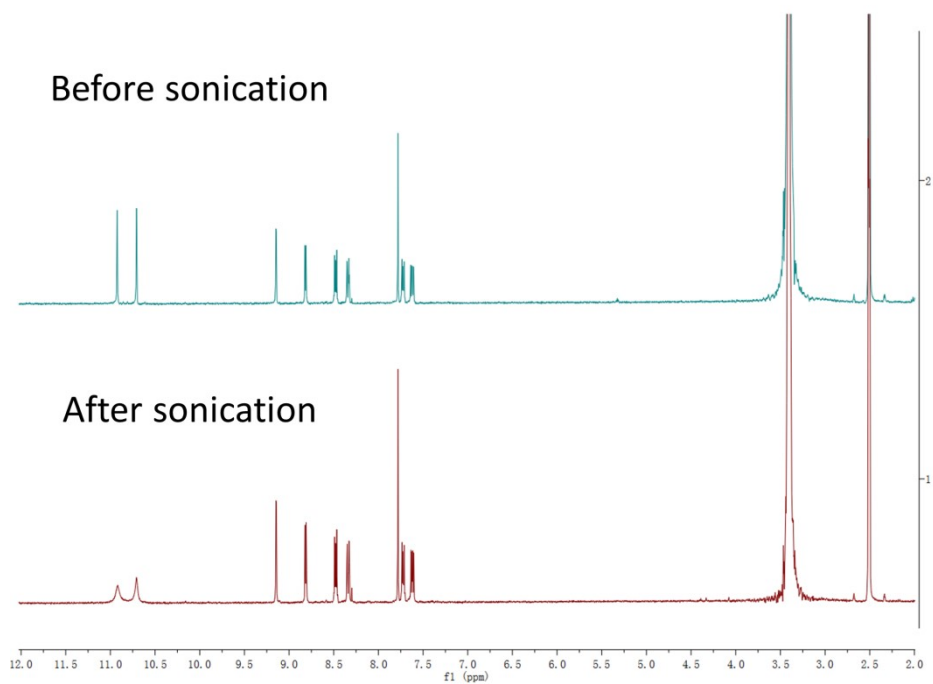

**Fig. S9.**  $^1\text{H}$  NMR spectra of NDC-NN3 before and after sonication

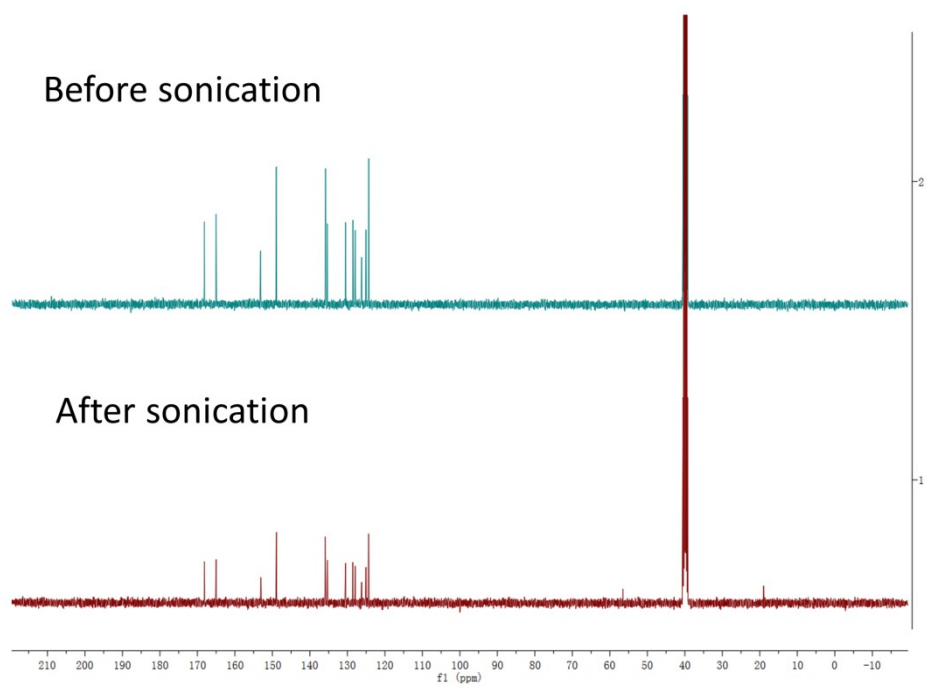

**Fig. S10.**  $^{13}\text{C}$  NMR spectra of NDC-NN3 before and after sonication



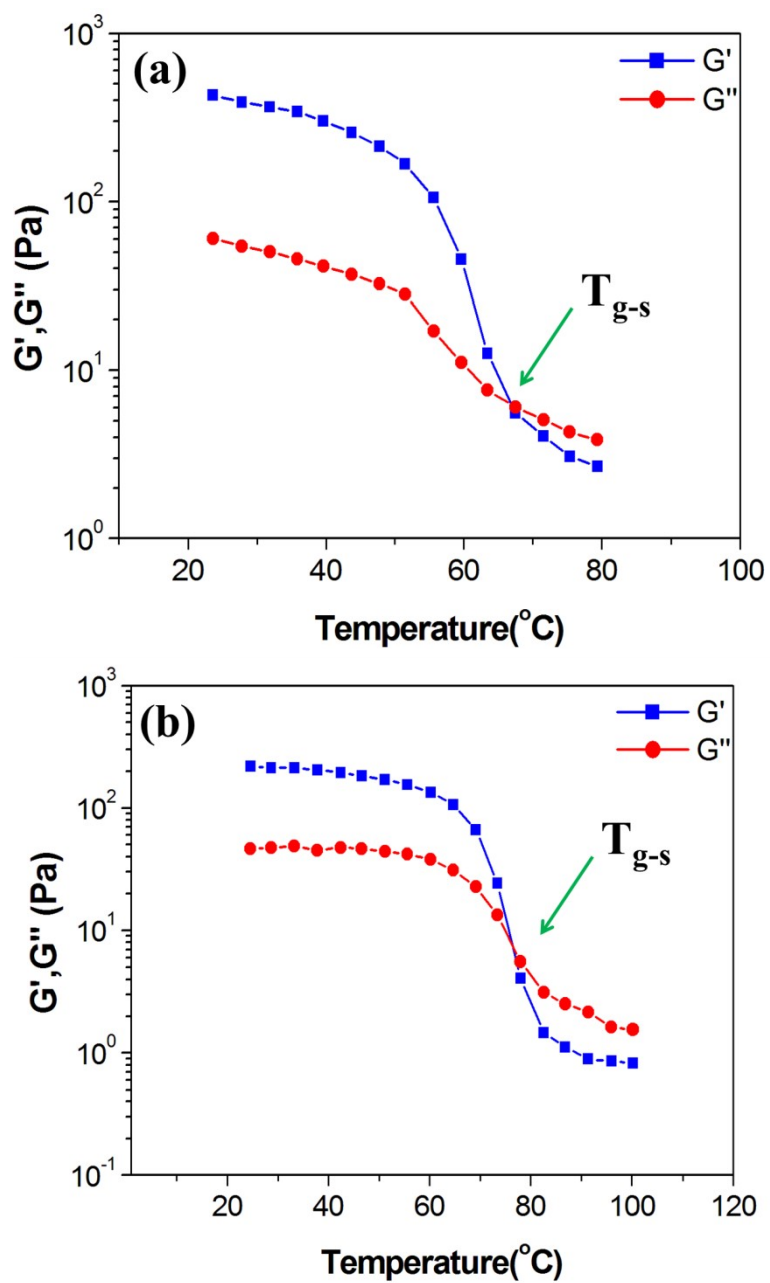

**Fig. S11.** Moduli variations of NDC-NN3 sonogels (10 mg·mL<sup>-1</sup>) with increasing temperature: (a) ethanol and (b) 1,4-dioxane as solutions, respectively

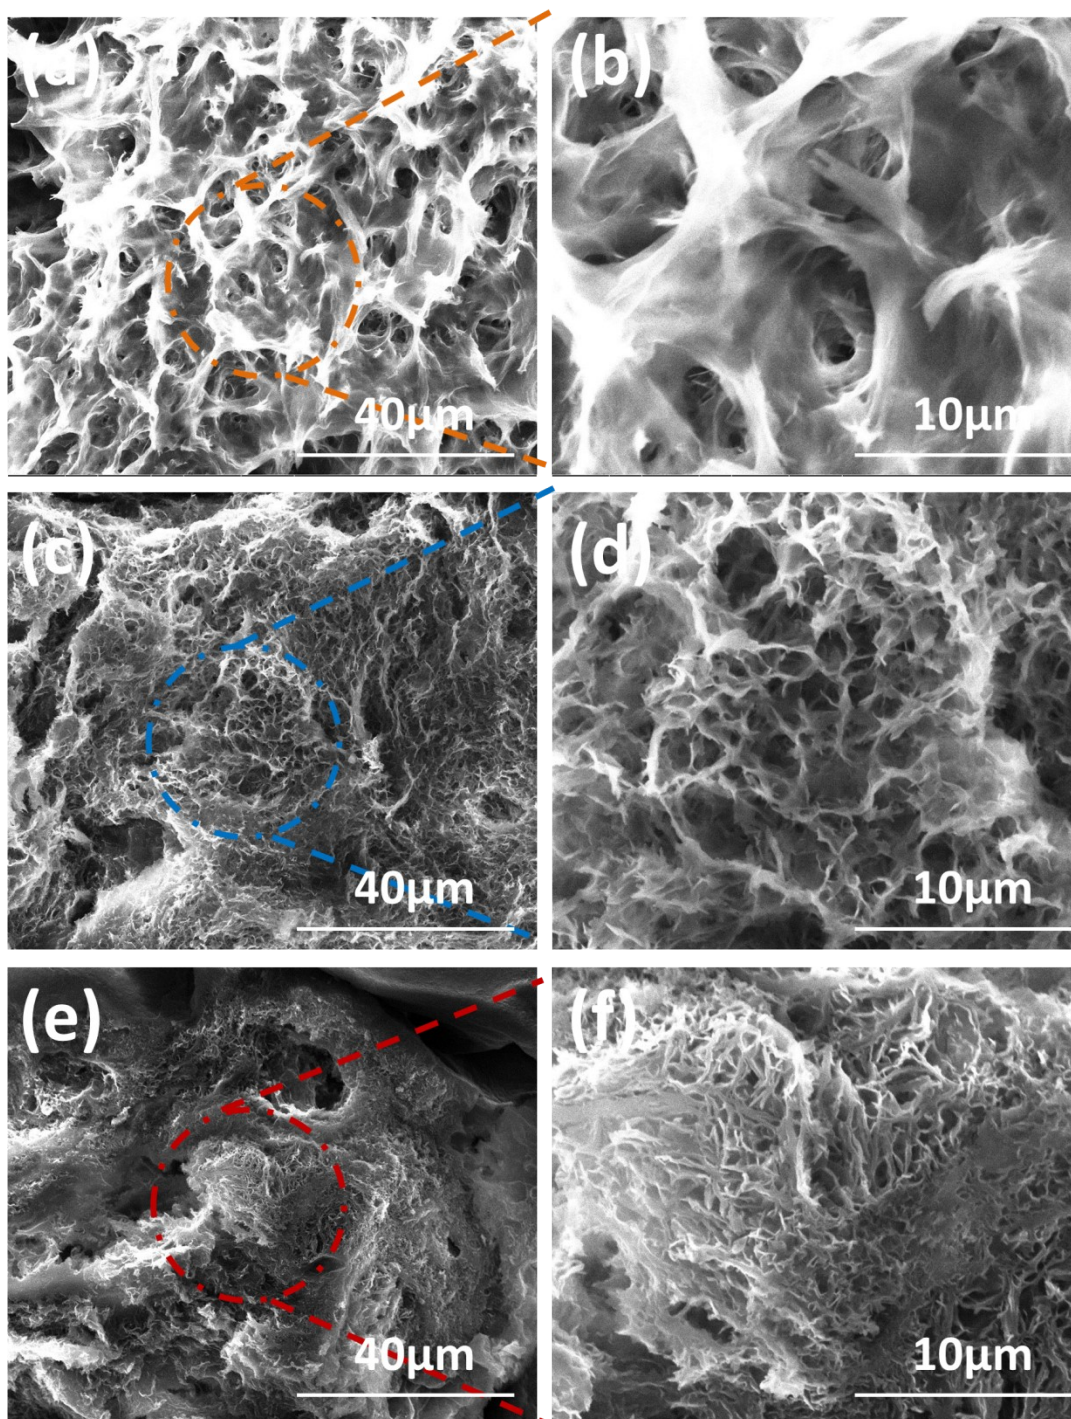

**Fig. S12.** SEM images of NDC-NN3 aggregates in dried sonogels formed in different solvents: (a,b) *n*-propanol; (c,d) *n*-butanol; (e,f) *n*-pentanol

**Table S4.** Transformation of gel-crystal for NDC-NN3 in various solvents

| Solvents           | $C_{\text{PDA-N4}}$<br>$\text{mg}\cdot\text{mL}^{-1}$ | Time / Days |     |     |     |     |     |     |     |
|--------------------|-------------------------------------------------------|-------------|-----|-----|-----|-----|-----|-----|-----|
|                    |                                                       | 1D          | 2D  | 5D  | 10D | 15D | 30D | 60D | 90D |
| Ethanol            | 10                                                    | G           | G   | G   | G   | G+C | G+C | C   | C   |
|                    | 20                                                    | G           | G   | G   | G+C | G+C | C   | C   | C   |
|                    | 30                                                    | G           | G   | G+C | G+C | C   | C   | C   | C   |
|                    | 40                                                    | G+C         | G+C | G+C | G+C | C   | C   | C   | C   |
| THF                | 8                                                     | G           | G   | G   | G   | G   | G   | G   | G   |
|                    | 10                                                    | G           | G   | G   | G   | G   | G   | G   | G   |
| 1,4-Dioxane        | 6                                                     | G           | G   | G   | G   | G   | G   | G   | G   |
|                    | 8                                                     | G           | G   | G   | G   | G   | G   | G   | G   |
|                    | 10                                                    | G           | G   | G   | G   | G   | G   | G   | G   |
| <i>n</i> -Propanol | 8                                                     | G           | G   | G   | G   | G   | G   | G   | G   |
|                    | 10                                                    | G           | G   | G   | G   | G   | G   | G   | G   |
|                    | 15                                                    | G           | G   | G   | G   | G   | G   | G   | G   |
| <i>n</i> -Butanol  | 6                                                     | G           | G   | G   | G   | G   | G   | G   | G   |
|                    | 8                                                     | G           | G   | G   | G   | G   | G   | G   | G   |
|                    | 10                                                    | G           | G   | G   | G   | G   | G   | G   | G   |
| <i>n</i> -Pentanol | 8                                                     | G           | G   | G   | G   | G   | G   | G   | G   |
|                    | 10                                                    | G           | G   | G   | G   | G   | G   | G   | G   |

\* G = gel; C = crystal.

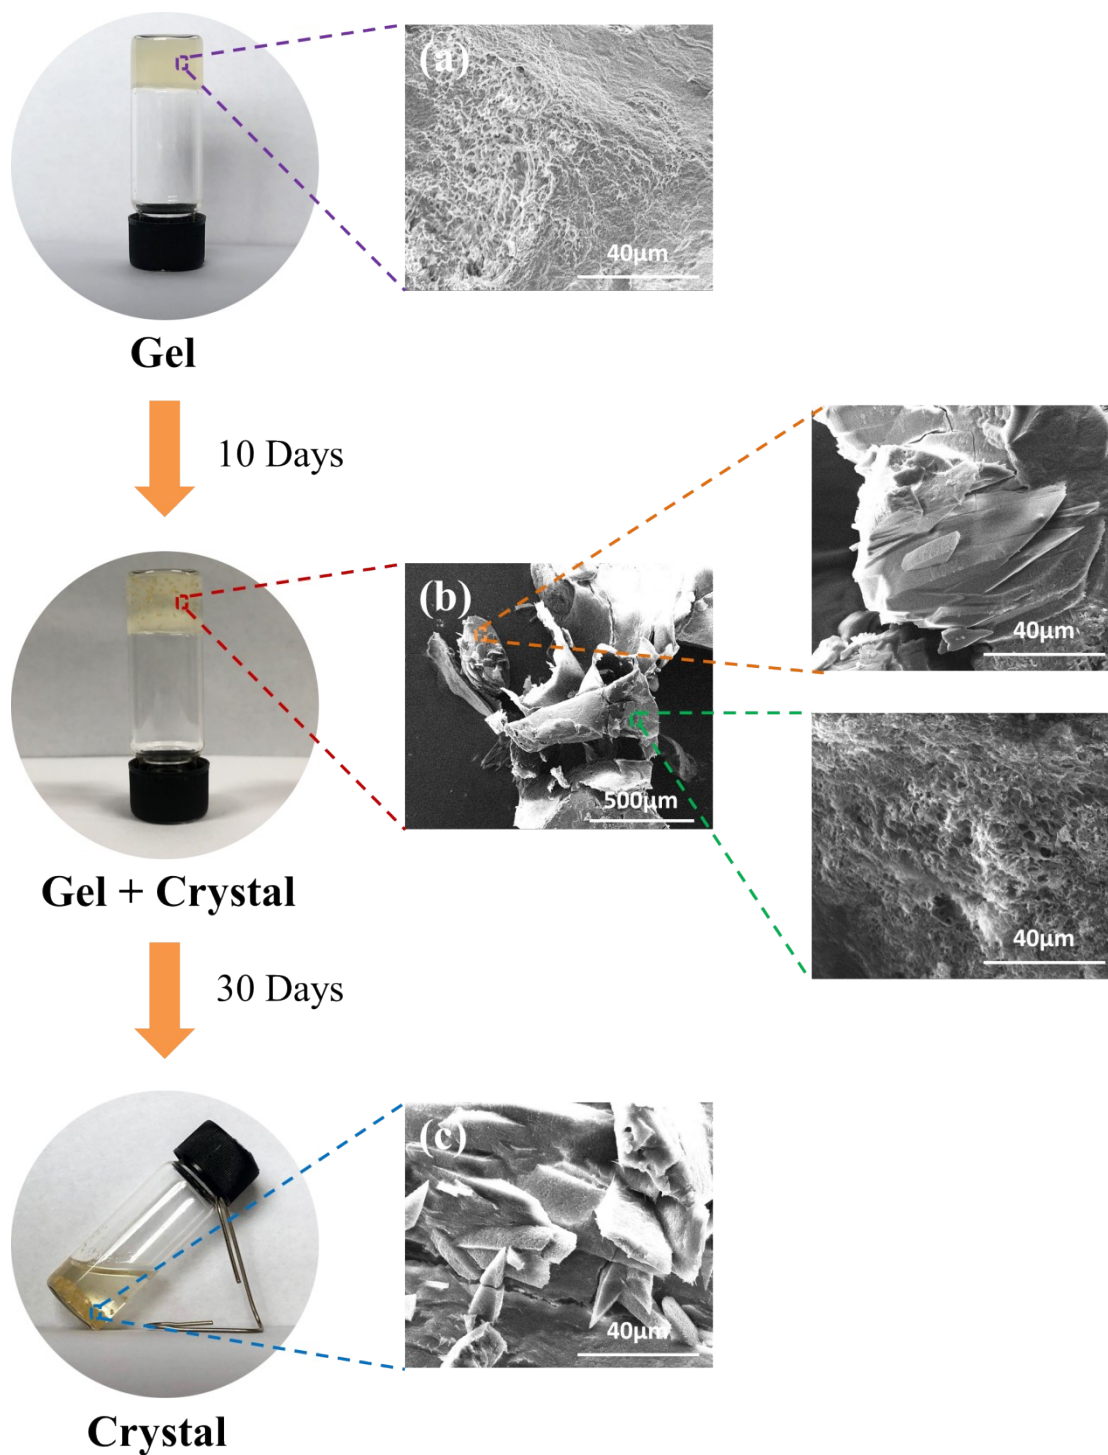

**Fig. S13.** Images of NDC-NN3 aggregates in sonogel (ethanol, 20 mg·mL<sup>-1</sup>) aged at room temperature for (a) 0 day, (b) 10 days and (c) 30 days

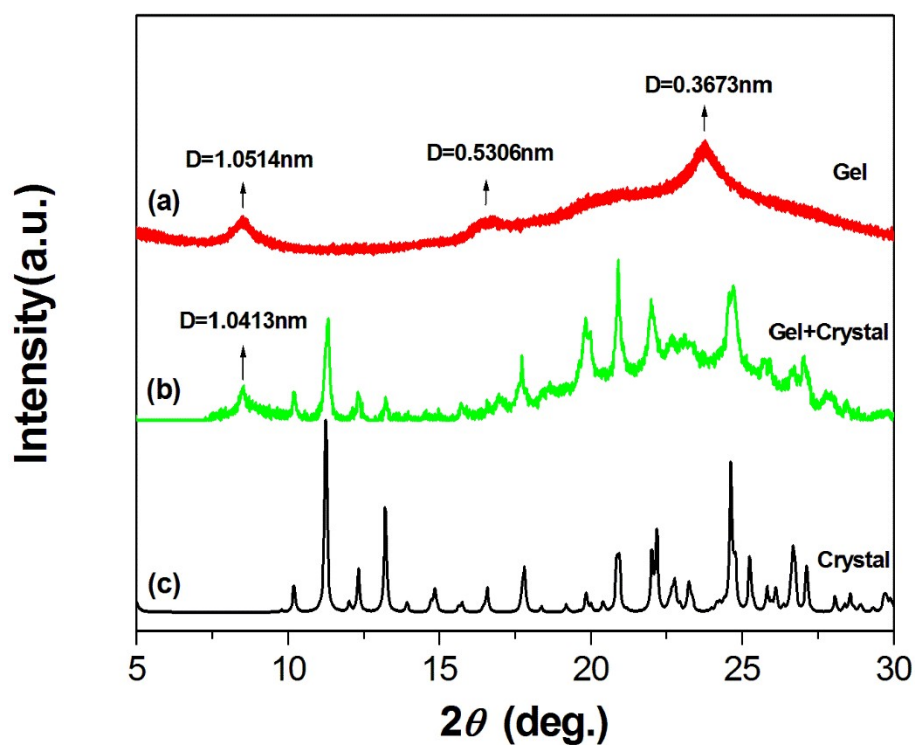

**Fig. S14.** SA-XRD patterns of NDC-NN3 sonogel (ethanol,  $20 \text{ mg} \cdot \text{mL}^{-1}$ ) aged at  $25^\circ\text{C}$  for (a) 0 day, (b) 10 days and (c) 30 days (the simulated XRD pattern from the NDC-NN3 crystal data)

**Table S5.** Crystal data and structure refinement for NDC-NN3

| <b>Compound</b>                                      | <b>NDC-NN3</b>                                                    |
|------------------------------------------------------|-------------------------------------------------------------------|
| Formula                                              | C <sub>102</sub> H <sub>102</sub> N <sub>24</sub> O <sub>25</sub> |
| F.w.                                                 | 2064.07                                                           |
| <i>T</i> (K)                                         | 100.01(10)                                                        |
| Crystal system                                       | Monoclinic                                                        |
| Space group                                          | <i>P</i> 21/ <i>n</i>                                             |
| <i>a</i> (Å)                                         | 8.0569(2)                                                         |
| <i>b</i> (Å)                                         | 36.1507(7)                                                        |
| <i>c</i> (Å)                                         | 8.9337(2)                                                         |
| $\alpha$ (°)                                         | 90                                                                |
| $\beta$ (°)                                          | 90.440(2)                                                         |
| $\gamma$ (°)                                         | 90                                                                |
| <i>V</i> (Å <sup>3</sup> )                           | 2601.98(10)                                                       |
| <i>Z</i>                                             | 1                                                                 |
| <i>D</i> <sub>c</sub> (g/cm <sup>3</sup> )           | 1.317                                                             |
| $\mu$ (mm <sup>-1</sup> )                            | 0.807                                                             |
| <i>R</i> <sub>int</sub>                              | 0.0782                                                            |
| GOF                                                  | 1.050                                                             |
| <i>R</i> 1, <i>wR</i> 2 [ <i>I</i> > 2σ( <i>I</i> )] | 0.1023, 0.2832                                                    |
| <i>R</i> 1, <i>wR</i> 2 (all data)                   | 0.1123, 0.2949                                                    |



**Table S6.** Selected bond lengths (Å) and angles (°) for NDC-NN3 crystal

|         |          |          |           |
|---------|----------|----------|-----------|
| O4—C2   | 1.236(4) | N2—H2    | 0.8800    |
| N6—C5   | 1.352(4) | N2—C20   | 1.376(7)  |
| N6—C9   | 1.331(5) | N2—N1    | 1.377(5)  |
| C2—N4   | 1.338(4) | C15—C18  | 1.373(6)  |
| C2—C4   | 0.8800   | C15—C20  | 1.507(5)  |
| N3—N4   | 1.395(4) | C16—H16  | 0.9500    |
| N3—C7   | 1.354(4) | C16—C17  | 1.411(6)  |
| N4—H4   | 0.8800   | C17—H17  | 0.9500    |
| O3—C7   | 1.220(4) | C18—H18  | 0.9500    |
| C3—H3A  | 0.9500   | C19—N1   | 1.327(6)  |
| C3—C4   | 1.386(5) | C19—C21  | 1.499(6)  |
| C3—C6   | 1.388(5) | N1—H1    | 0.8800    |
| C4—C5   | 1.384(5) | C21—C22  | 1.402(7)  |
| C5—H5   | 0.9500   | C21—C25  | 1.371(7)  |
| C6—H6   | 0.9500   | C22—H22  | 0.9500    |
| C6—C9   | 1.378(5) | C22—N5   | 1.327(6)  |
| C7—C11  | 1.509(4) | N5—C26   | 1.316(8)  |
| C8—C10  | 1.435(5) | C24—H24  | 0.9500    |
| C8—C11  | 1.428(5) | C24—C25  | 1.423(8)  |
| C8—C12  | 1.406(6) | C24—C26  | 1.354(10) |
| C9—H9   | 0.9500   | C25—H25  | 0.9500    |
| C10—C14 | 1.438(6) | O5—H5A   | 0.8698    |
| C10—C15 | 1.411(6) | O5—H5B   | 0.8707    |
| C11—C13 | 1.353(6) | O8—H8    | 0.8400    |
| O2—C20  | 1.221(6) | O8—C27   | 1.353(9)  |
| O1—C19  | 1.312(5) | O6—H6A   | 0.8707    |
| C12—H12 | 0.9500   | O6—H6B   | 0.8698    |
| C12—C16 | 1.373(6) | C27—H27A | 0.9900    |

|           |          |             |           |
|-----------|----------|-------------|-----------|
| C13—H13   | 0.9500   | C27—H27B    | 0.9900    |
| C13—C18   | 1.422(5) | C27—C28     | 1.518(11) |
| C14—H14   | 0.9500   | C28—H28A    | 0.9800    |
| C14—C17   | 1.351(7) | C28—H28B    | 0.9800    |
| C9—N6—C5  | 117.2(3) | N1—N2—H2    | 120.1     |
| O4—C2—N4  | 123.7(3) | C10—C15—C20 | 119.2(4)  |
| O4—C2—C4  | 121.8(3) | C18—C15—C10 | 121.9(3)  |
| N4—C2—C4  | 114.5(3) | C18—C15—C20 | 118.7(4)  |
| N4—N3—H3  | 121.2    | C12—C16—H16 | 120.0     |
| C7—N3—H3  | 121.2    | C12—C16—C17 | 120.1(4)  |
| C7—N3—N4  | 117.5(3) | C17—C16—H16 | 120.0     |
| C2—N4—N3  | 120.6(3) | C14—C17—C16 | 120.1(4)  |
| C9—N6—C5  | 117.2(3) | C14—C17—H17 | 120.0     |
| C2—N4—H3  | 119.7    | C16—C17—H17 | 120.0     |
| N3—N4—H4  | 119.7    | C13—C18—H18 | 120.3     |
| C4—C3—H3A | 120.8    | C15—C18—C13 | 119.5(4)  |
| C4—C3—C6  | 118.4(3) | C15—C18—H18 | 120.3     |
| C6—C3—H3A | 120.8    | N1—C19—C21  | 116.3(4)  |
| C3—C4—C2  | 123.9(3) | N2—C20—C15  | 112.5(4)  |
| C5—C4—C2  | 117.3(3) | N2—N1—H1    | 119.4     |
| C5—C4—C3  | 118.7(3) | C19—N1—N2   | 121.3(4)  |
| N6—C5—C4  | 123.1(3) | C19—N1—H1   | 119.4     |
| N6—C5—C4  | 118.5    | C22—C21—C19 | 123.7(4)  |
| C4—C5—H5  | 118.5    | C25—C21—C19 | 119.5(5)  |
| C3—C6—H6  | 120.5    | C25—C21—C22 | 116.8(4)  |
| C9—C6—C3  | 119.0(3) | C21—C22—H22 | 117.0     |
| C9—C6—H6  | 120.5    | N5—C22—C21  | 126.0(5)  |
| N3—C7—C11 | 113.3(3) | N5—C22—H22  | 117.0     |



|             |          |               |          |
|-------------|----------|---------------|----------|
| O3—C7—N3    | 123.7(3) | C26—N5—C22    | 115.4(5) |
| O3—C7—C11   | 122.9(3) | C25—C24—H24   | 120.6    |
| C11—C8—C10  | 118.4(4) | C26—C24—H24   | 120.6    |
| C12—C8—C10  | 119.3(3) | C26—C24—C25   | 118.8(5) |
| C12—C8—C11  | 122.3(3) | C21—C25—C24   | 117.8(6) |
| N6—C9—C6    | 123.5(3) | C21—C25—H25   | 121.1    |
| N6—C9—H9    | 118.2    | C24—C25—H25   | 121.1    |
| C6—C9—H9    | 118.2    | N5—C26—C24    | 125.2(5) |
| C8—C10—C14  | 117.0(4) | N5—C26—H26    | 117.4    |
| C15—C10—C8  | 118.3(4) | C24—C26—H26   | 117.4    |
| C15—C10—C14 | 124.7(4) | H5A—O5—H5B    | 104.4    |
| C8—C11—C7   | 119.0(3) | C27—O8—H8     | 109.5    |
| C13—C11—C7  | 119.5(3) | H6A—O6—H6B    | 104.5    |
| C13—C11—C8  | 121.5(3) | O8—C27—H27A   | 107.4    |
| C8—C12—H12  | 119.3    | O8—C27—H27B   | 107.4    |
| C16—C12—C8  | 121.4(4) | O8—C27—C28    | 119.8(4) |
| C16—C12—H12 | 119.3    | H27A—C27—H27B | 106.9    |
| C11—C13—H13 | 119.8    | C28—C27—H27A  | 107.4    |
| C11—C13—C18 | 120.4(4) | C28—C27—H27B  | 107.4    |
| C18—C13—H13 | 119.8    | C27—C28—H28A  | 109.5    |
| C10—C14—H14 | 118.9    | C27—C28—H28B  | 109.5    |
| C17—C14—C10 | 122.4(4) | C27—C28—H28C  | 109.5    |
| C17—C14—H14 | 118.9    | H28A—C28—H28B | 109.5    |
| C20—N2—H2   | 120.1    | H28A—C28—H28C | 109.5    |
| C20—N2—N1   | 119.7(4) | H28B—C28—H28C | 109.5    |

---

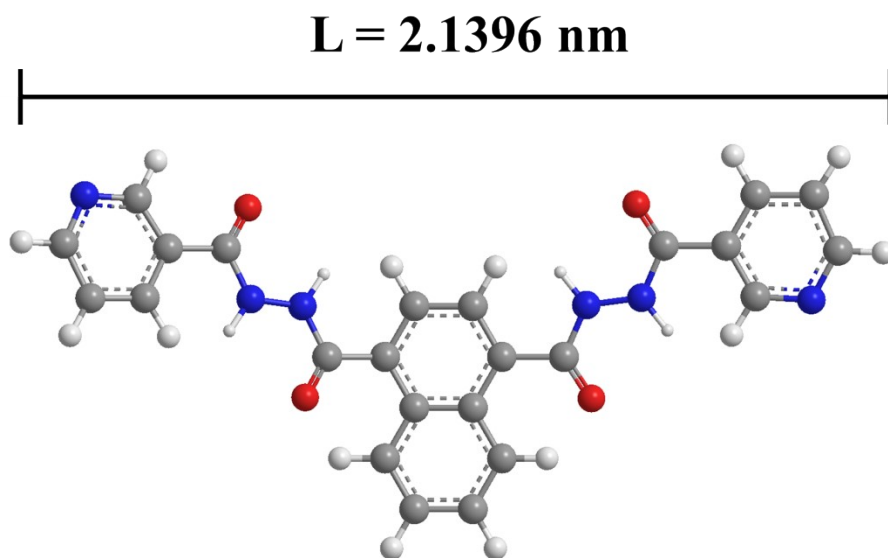

**Fig. S15.** CPK space-filling model of NDC-NN3

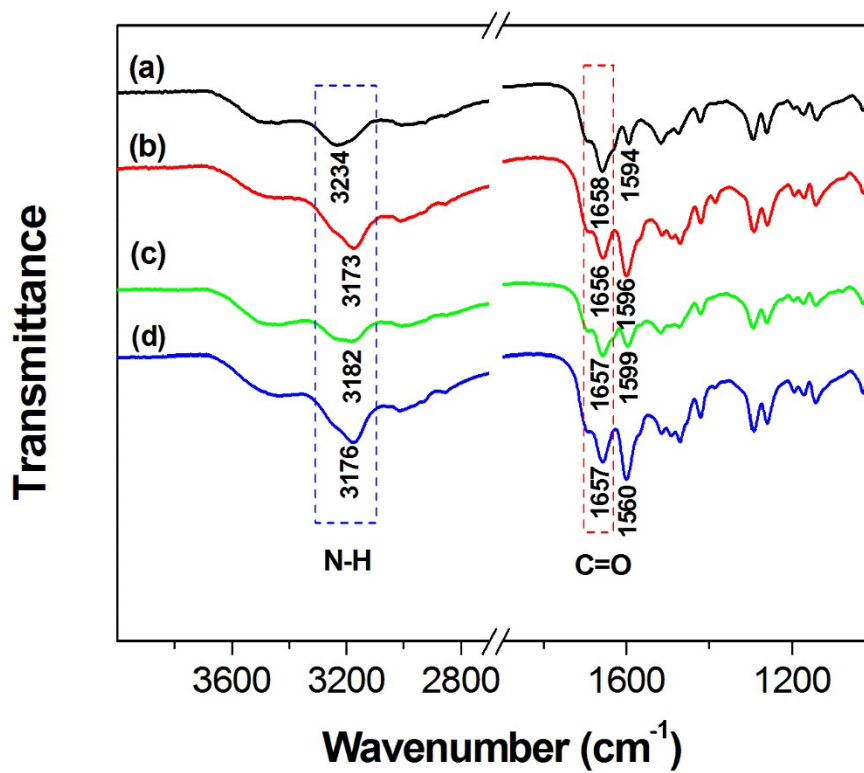

**Fig. S16.** FT-IR spectra of (a) NDC-NN3 crystal and xerogels formed from sonogels with (b) ethanol, (c) THF and (d) 1,4-dioxane as solvents

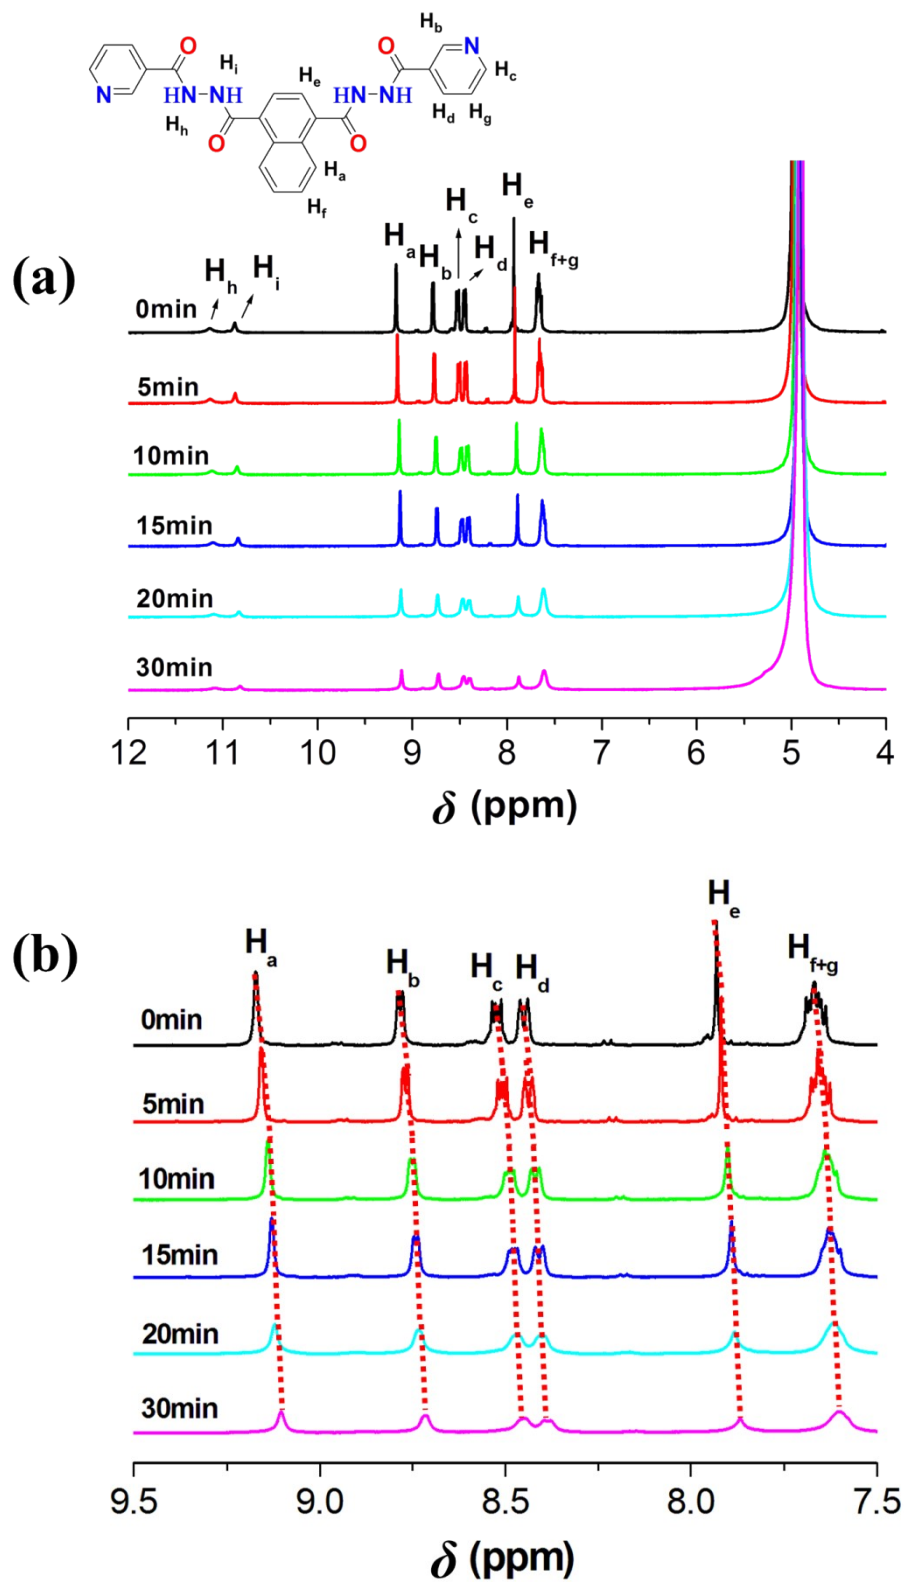

**Fig. S17.** (a) Variable-time  $^1\text{H}$  NMR spectra of NDC-NN3 sonogel (ethanol- $d_6$ ,  $20\text{ mg}\cdot\text{mL}^{-1}$ ) and (b) the partial image enlargement

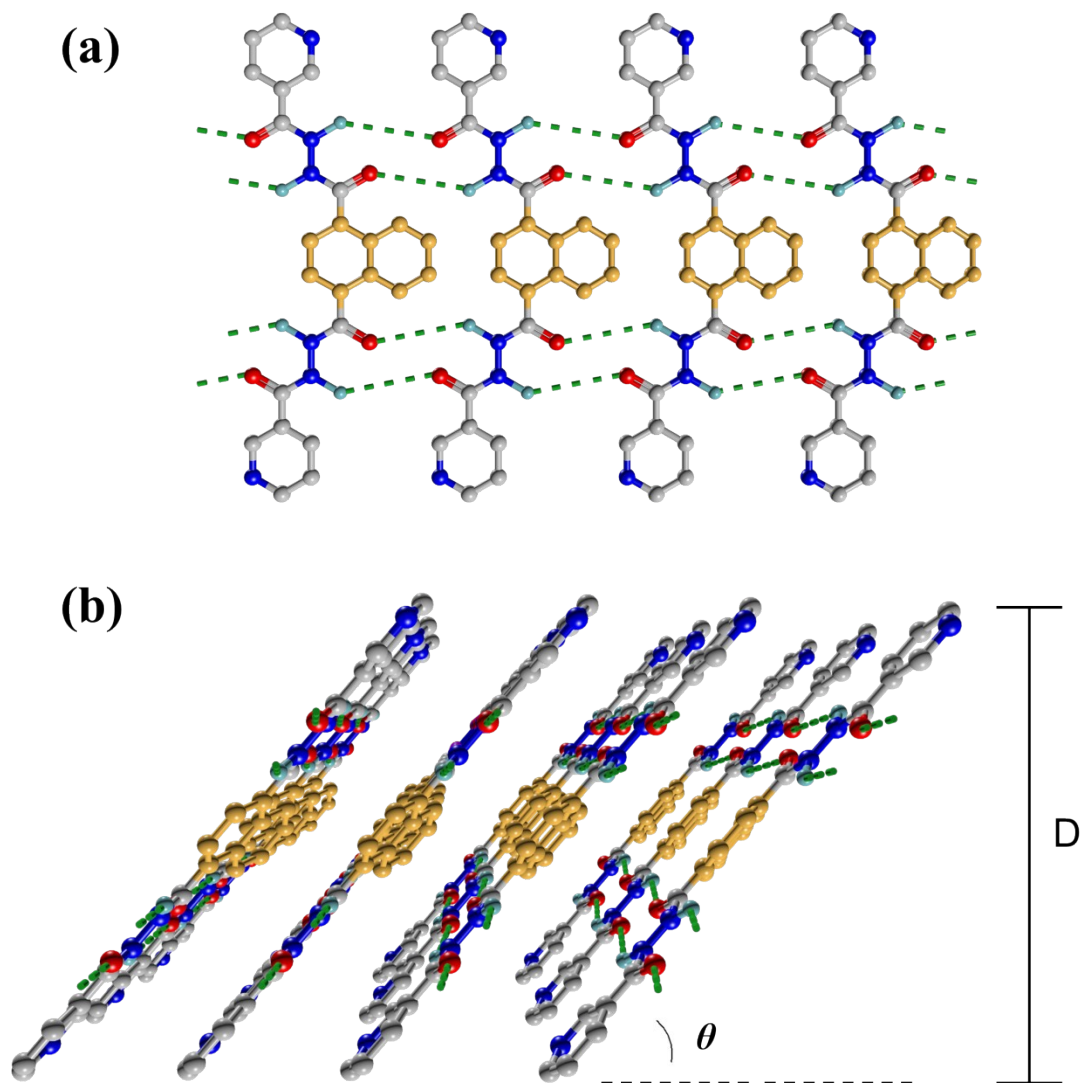

**Fig. S18.** Schematic representation of the possible local aggregation for NDC-NN3 in sonogels: (a) 2D and (b) 3D structure

## 2. References

- 1 X. Z. Luo, X. J. Jia, J. H. Deng, J. L. Zhong, H. J. Liu, K. J. Wang and D. C. Zhong, *J. Am. Chem. Soc.*, 2013, 135, 11684-11687.
